# Supplementary material
Source: PubMed Central journal article supplement (PMC8603813)
Supplement: NIHMS1728851-supplement-1.pdf [file NIHMS1728851-supplement-1.pdf]

## Journal of Hepatology

### CTAT methods

Tables for a “Complete, Transparent, Accurate and Timely account” (CTAT) are now mandatory for all revised submissions. The aim is to enhance the reproducibility of methods.

- Only include the parts relevant to your study
- Refer to the CTAT in the main text as ‘Supplementary CTAT Table’
- Do not add subheadings
- Add as many rows as needed to include all information
- Only include one item per row

If the CTAT form is not relevant to your study, please outline the reasons why:

#### 1.1 Antibodies

| Name                     | Citation                                          | Supplier                              | Cat no.          | Clone no.  |
|--------------------------|---------------------------------------------------|---------------------------------------|------------------|------------|
| CD3 V500                 |                                                   | BD                                    | 560770           | SP34-2     |
| CD3 PerCP                |                                                   | BD                                    | 552851           | SP34-2     |
| CD3 AF700                |                                                   | BD                                    | 557917           | SP34-2     |
| CD4 PE-Cy7               |                                                   | BD                                    | 560644           | L200       |
| CD4 BUV395               |                                                   | BD                                    | 564107           | L200       |
| CD8 AF700                |                                                   | BD                                    | 557945           | RPA-T8     |
| CD8 PE-Cy7               |                                                   | BD                                    | 557746           | RPA-T8     |
| CD14 PE-Cy7              |                                                   | BD                                    | 557742           | M5E2       |
| CD16 PE-Cy7              |                                                   | BD                                    | 557744           | 3G8        |
| CD19 PE-Cy7              |                                                   | BD                                    | 560728           | HIB19      |
| TNF- $\alpha$ AF700      |                                                   | BD                                    | 557996           | MAB11      |
| IFN- $\gamma$ PB         |                                                   | Biolegend                             | 502522           | 4S.B3      |
| IL-2 APC                 |                                                   | Biolegend                             | 500310           | MQ1-17H12  |
| CD8 FITC                 |                                                   | Dako                                  | F0765            | DK25       |
| CD107a FITC              |                                                   | eBioscience                           | 11-1079-42       | eBioH4A3   |
| IL-21 PE                 |                                                   | eBioscience                           | 12-7219-42       | eBio3A3-N2 |
| L/D near-IR              |                                                   | Invitrogen                            | L10119           | n/a        |
| Anti-CD8 alpha (MT807R1) | Schmitz JE et al. Am J Pathol 1999. PMID:10362819 | NIH nonhuman Primate Reagent Resource | RRID: AB_2716320 | MT807R1    |

#### 1.2 Cell lines

| Name                                                                                  | Citation                                   | Supplier | Cat no.             | Passage no. | Authentication test method                                                                          |
|---------------------------------------------------------------------------------------|--------------------------------------------|----------|---------------------|-------------|-----------------------------------------------------------------------------------------------------|
| HepG2/C3A transduced with lentivirus expressing small hairpin (sh) RNA targeting MAVS | Yin et al. PloS Pathog. 2017 PMID:28558073 | ATCC     | HepG2/C3A CRL-10741 | 3-12        | Morphologically and Western blot with antibody against MAVS as well as IFN- $\beta$ promoter assay. |

## 1.3 Organisms

| Name   | Citation | Supplier | Strain | Sex     | Age       | Overall n number |
|--------|----------|----------|--------|---------|-----------|------------------|
| Macaca | Mulatta  | Various  | Indian | 13M, 1F | 3-6 years | 14               |

## 1.4 Sequence based reagents

| Name                   | Sequence             | Supplier                   |
|------------------------|----------------------|----------------------------|
| HEVqPCR Forward Primer | CATGGCTACTGAGGCATCCA | Eurofins                   |
| HEVqPCR Reverse Primer | GCGGTAGCGGATCGTAGCT  | Eurofins                   |
| HEVqPCR Probe          | CTATGCTCAGTATCGGGTC  | Eurofins                   |
| HEV X-domain 917       | LTPRPIIHAV           | Immudex                    |
| HEV Polymerase 1724    | VSPGLVHNL            | Immudex                    |
| HEV ORF2 1913          | ASGTNLVLYAAPLNPLL    | NIH Tetramer Core Facility |
| HEV ORF2 1923          | APLNPLL              | NIH Tetramer Core Facility |
| HEV ORF2 2088          | YTSTARHRL            | Immudex                    |
| rhCMV pp65 906         | NPTDRPIP             | NIH Tetramer Core Facility |

## 1.5 Biological samples

| Description                        | Source                  | Identifier            |
|------------------------------------|-------------------------|-----------------------|
| HEV for passaged inoculum          | Human fecal suspension  | gt3 HEV strain Kernow |
| Passaged HEV for rhesus infections | Rhesus fecal suspension | HEV rhesus inoculum   |

## 1.6 Deposited data

| Name of repository | Identifier | Link |
|--------------------|------------|------|
|                    |            |      |

## 1.7 Software

| Software name   | Manufacturer            | Version |
|-----------------|-------------------------|---------|
| Graphpad Prism  | GraphPad Software, Inc. | 8.2.0   |
| FlowJo          | FlowJo, LLC             | 9.8.2   |
| Microsoft Excel | Microsoft               | 15.37   |
| Image J         | NIH                     | 1.51s   |

## 1.8 Other (e.g. drugs, proteins, vectors etc.)

|  |  |  |
|--|--|--|
|  |  |  |
|  |  |  |

## 1.9 Please provide the details of the corresponding methods author for the manuscript:

|                                                                                                                                  |
|----------------------------------------------------------------------------------------------------------------------------------|
| <p><b>Christopher Walker, Ph.D. Nationwide Children's Hospital, WA4011. 700 Children's Drive, Columbus, Ohio. USA. 43205</b></p> |
|----------------------------------------------------------------------------------------------------------------------------------|

**2.0 Please confirm for randomised controlled trials all versions of the clinical protocol are included in the submission. These will be published online as supplementary information.**

**Not applicable**
